# Supplementary material for: The isolable matryoshka nesting doll icosahedral cluster [As@Ni12@As20]3−as a “superatom”: analogy with the jellium cluster Al13−generated in the gas phase by laser vaporization
Source: Royal Society of Chemistry journal article supplement (doi:10.1039/b607895h), 2006-01-01
Supplement: b607895h.pdf [file b607895h.pdf]

# The Isolable Matryoshka Nesting Doll Icosahedral Cluster $[\text{As}@\text{Ni}_{12}@\text{As}_{20}]^{3-}$ as a “Superatom”: Analogy with the Jellium Cluster $\text{Al}_{13}^-$ Generated in the Gas Phase by Laser Vaporization

R. Bruce King<sup>\*a</sup> and Jijun Zhao<sup>\*b</sup>

<sup>a</sup>Department of Chemistry and Center for Computational Chemistry, University of Georgia, Athens, Georgia, USA and <sup>b</sup>State Key Laboratory of Materials Modification by Laser, Electron, and Ion Beams & College of Advanced Science and Technology, Dalian University of Technology, Dalian, China

## Supporting Information

**Table S1.** Bonding molecular orbitals of regular dodecahedral  $\text{As}_{20}$  ( $I_h$  symmetry)

**Table S2.** Bonding molecular orbitals of  $[\text{As}@\text{Ni}_{12}@\text{As}_{20}]^{3-}$  ( $I_h$  symmetry)

**Table S1.** Bonding molecular orbitals of regular dodecahedral As<sub>20</sub> (*I<sub>h</sub>* symmetry)

|     |   |    |       |           |         |       |
|-----|---|----|-------|-----------|---------|-------|
| 281 | + | 7  | AG.1  | -0.592216 | -16.115 | 2.000 |
| 282 | + | 11 | T1U.1 | -0.576985 | -15.701 | 2.000 |
| 283 | + | 11 | T1U.2 | -0.576985 | -15.701 | 2.000 |
| 284 | + | 11 | T1U.3 | -0.576985 | -15.701 | 2.000 |
| 285 | + | 15 | HG.1  | -0.550173 | -14.971 | 2.000 |
| 286 | + | 15 | HG.2  | -0.550173 | -14.971 | 2.000 |
| 287 | + | 15 | HG.3  | -0.550173 | -14.971 | 2.000 |
| 288 | + | 15 | HG.4  | -0.550173 | -14.971 | 2.000 |
| 289 | + | 15 | HG.5  | -0.550173 | -14.971 | 2.000 |
| 290 | + | 11 | GU.1  | -0.526001 | -14.313 | 2.000 |
| 291 | + | 11 | GU.3  | -0.526001 | -14.313 | 2.000 |
| 292 | + | 11 | GU.4  | -0.526001 | -14.313 | 2.000 |
| 293 | + | 11 | GU.2  | -0.526001 | -14.313 | 2.000 |
| 294 | + | 11 | GG.1  | -0.470432 | -12.801 | 2.000 |
| 295 | + | 11 | GG.2  | -0.470432 | -12.801 | 2.000 |
| 296 | + | 11 | GG.3  | -0.470432 | -12.801 | 2.000 |
| 297 | + | 11 | GG.4  | -0.470432 | -12.801 | 2.000 |
| 298 | + | 11 | T2U.1 | -0.463842 | -12.622 | 2.000 |
| 299 | + | 11 | T2U.3 | -0.463842 | -12.622 | 2.000 |
| 300 | + | 11 | T2U.2 | -0.463842 | -12.622 | 2.000 |
| 301 | + | 16 | HG.1  | -0.283424 | -7.712  | 2.000 |
| 302 | + | 16 | HG.5  | -0.283424 | -7.712  | 2.000 |
| 303 | + | 16 | HG.2  | -0.283424 | -7.712  | 2.000 |
| 304 | + | 16 | HG.3  | -0.283424 | -7.712  | 2.000 |
| 305 | + | 16 | HG.4  | -0.283424 | -7.712  | 2.000 |
| 306 | + | 12 | T2U.1 | -0.270769 | -7.368  | 2.000 |
| 307 | + | 12 | T2U.2 | -0.270769 | -7.368  | 2.000 |
| 308 | + | 12 | T2U.3 | -0.270769 | -7.368  | 2.000 |
| 309 | + | 9  | HU.1  | -0.266235 | -7.245  | 2.000 |
| 310 | + | 9  | HU.4  | -0.266235 | -7.245  | 2.000 |
| 311 | + | 9  | HU.5  | -0.266235 | -7.245  | 2.000 |
| 312 | + | 9  | HU.2  | -0.266235 | -7.245  | 2.000 |
| 313 | + | 9  | HU.3  | -0.266235 | -7.245  | 2.000 |
| 314 | + | 8  | AG.1  | -0.254177 | -6.917  | 2.000 |
| 315 | + | 12 | T1U.1 | -0.238380 | -6.487  | 2.000 |
| 316 | + | 12 | T1U.2 | -0.238380 | -6.487  | 2.000 |
| 317 | + | 12 | T1U.3 | -0.238380 | -6.487  | 2.000 |
| 318 | + | 12 | GG.1  | -0.227590 | -6.193  | 2.000 |
| 319 | + | 12 | GG.4  | -0.227590 | -6.193  | 2.000 |
| 320 | + | 12 | GG.2  | -0.227590 | -6.193  | 2.000 |
| 321 | + | 12 | GG.3  | -0.227590 | -6.193  | 2.000 |
| 322 | + | 17 | HG.1  | -0.209652 | -5.705  | 2.000 |
| 323 | + | 17 | HG.2  | -0.209652 | -5.705  | 2.000 |
| 324 | + | 17 | HG.5  | -0.209652 | -5.705  | 2.000 |

|     |   |    |       |           |        |       |
|-----|---|----|-------|-----------|--------|-------|
| 325 | + | 17 | HG.3  | -0.209652 | -5.705 | 2.000 |
| 326 | + | 17 | HG.4  | -0.209652 | -5.705 | 2.000 |
| 327 | + | 12 | GU.1  | -0.189784 | -5.164 | 2.000 |
| 328 | + | 12 | GU.2  | -0.189784 | -5.164 | 2.000 |
| 329 | + | 12 | GU.3  | -0.189784 | -5.164 | 2.000 |
| 330 | + | 12 | GU.4  | -0.189784 | -5.164 | 2.000 |
| 331 | + | 13 | T1U.1 | -0.139560 | -3.798 | 0.000 |
| 332 | + | 13 | T1U.2 | -0.139560 | -3.798 | 0.000 |
| 333 | + | 13 | T1U.3 | -0.139560 | -3.798 | 0.000 |
| 334 | + | 18 | HG.1  | -0.121714 | -3.312 | 0.000 |
| 335 | + | 18 | HG.2  | -0.121714 | -3.312 | 0.000 |
| 336 | + | 18 | HG.3  | -0.121714 | -3.312 | 0.000 |
| 337 | + | 18 | HG.4  | -0.121714 | -3.312 | 0.000 |
| 338 | + | 18 | HG.5  | -0.121714 | -3.312 | 0.000 |
| 339 | + | 13 | GU.1  | -0.113385 | -3.085 | 0.000 |
| 340 | + | 13 | GU.2  | -0.113385 | -3.085 | 0.000 |
| 341 | + | 13 | GU.3  | -0.113385 | -3.085 | 0.000 |
| 342 | + | 13 | GU.4  | -0.113385 | -3.085 | 0.000 |
| 343 | + | 13 | GG.1  | -0.107567 | -2.927 | 0.000 |
| 344 | + | 13 | GG.4  | -0.107567 | -2.927 | 0.000 |
| 345 | + | 13 | GG.2  | -0.107567 | -2.927 | 0.000 |
| 346 | + | 13 | GG.3  | -0.107567 | -2.927 | 0.000 |
| 347 | + | 13 | T2U.1 | -0.104395 | -2.841 | 0.000 |
| 348 | + | 13 | T2U.2 | -0.104395 | -2.841 | 0.000 |
| 349 | + | 13 | T2U.3 | -0.104395 | -2.841 | 0.000 |
| 350 | + | 5  | T1G.1 | -0.103972 | -2.829 | 0.000 |
| 351 | + | 5  | T1G.2 | -0.103972 | -2.829 | 0.000 |
| 352 | + | 5  | T1G.3 | -0.103972 | -2.829 | 0.000 |
| 353 | + | 10 | HU.1  | -0.050920 | -1.386 | 0.000 |
| 354 | + | 10 | HU.4  | -0.050920 | -1.386 | 0.000 |
| 355 | + | 10 | HU.5  | -0.050920 | -1.386 | 0.000 |
| 356 | + | 10 | HU.2  | -0.050920 | -1.386 | 0.000 |
| 357 | + | 10 | HU.3  | -0.050920 | -1.386 | 0.000 |
| 358 | + | 5  | T2G.1 | -0.026431 | -0.719 | 0.000 |
| 359 | + | 5  | T2G.2 | -0.026431 | -0.719 | 0.000 |
| 360 | + | 5  | T2G.3 | -0.026431 | -0.719 | 0.000 |
| 361 | + | 14 | T2U.1 | 0.062171  | 1.692  | 0.000 |
| 362 | + | 14 | T2U.2 | 0.062171  | 1.692  | 0.000 |
| 363 | + | 14 | T2U.3 | 0.062171  | 1.692  | 0.000 |
| 364 | + | 9  | AG.1  | 0.075162  | 2.045  | 0.000 |
| 365 | + | 19 | HG.1  | 0.090629  | 2.466  | 0.000 |
| 366 | + | 19 | HG.5  | 0.090629  | 2.466  | 0.000 |
| 367 | + | 19 | HG.2  | 0.090629  | 2.466  | 0.000 |
| 368 | + | 19 | HG.3  | 0.090629  | 2.466  | 0.000 |

**Table S2.** Bonding molecular orbitals of  $[\text{As}@\text{Ni}_{12}@\text{As}_{20}]^{3-}$  ( $I_h$  symmetry)

|     |   |    |       |           |        |       |
|-----|---|----|-------|-----------|--------|-------|
| 403 | + | 15 | AG.1  | -0.327085 | -8.900 | 2.000 |
| 404 | + | 20 | T1U.1 | -0.300467 | -8.176 | 2.000 |
| 405 | + | 20 | T1U.3 | -0.300467 | -8.176 | 2.000 |
| 406 | + | 20 | T1U.2 | -0.300467 | -8.176 | 2.000 |
| 407 | + | 23 | HG.1  | -0.264877 | -7.208 | 2.000 |
| 408 | + | 23 | HG.2  | -0.264877 | -7.208 | 2.000 |
| 409 | + | 23 | HG.3  | -0.264877 | -7.208 | 2.000 |
| 410 | + | 23 | HG.4  | -0.264877 | -7.208 | 2.000 |
| 411 | + | 23 | HG.5  | -0.264877 | -7.208 | 2.000 |
| 412 | + | 16 | AG.1  | -0.254350 | -6.921 | 2.000 |
| 413 | + | 13 | GU.1  | -0.235062 | -6.396 | 2.000 |
| 414 | + | 13 | GU.2  | -0.235062 | -6.396 | 2.000 |
| 415 | + | 13 | GU.3  | -0.235062 | -6.396 | 2.000 |
| 416 | + | 13 | GU.4  | -0.235062 | -6.396 | 2.000 |
| 417 | + | 13 | GG.1  | -0.179752 | -4.891 | 2.000 |
| 418 | + | 13 | GG.2  | -0.179752 | -4.891 | 2.000 |
| 419 | + | 13 | GG.3  | -0.179752 | -4.891 | 2.000 |
| 420 | + | 13 | GG.4  | -0.179752 | -4.891 | 2.000 |
| 421 | + | 16 | T2U.1 | -0.176898 | -4.814 | 2.000 |
| 422 | + | 16 | T2U.2 | -0.176898 | -4.814 | 2.000 |
| 423 | + | 16 | T2U.3 | -0.176898 | -4.814 | 2.000 |
| 424 | + | 21 | T1U.1 | -0.047508 | -1.293 | 2.000 |
| 425 | + | 21 | T1U.3 | -0.047508 | -1.293 | 2.000 |
| 426 | + | 21 | T1U.2 | -0.047508 | -1.293 | 2.000 |
| 427 | + | 24 | HG.1  | -0.022716 | -0.618 | 2.000 |
| 428 | + | 24 | HG.2  | -0.022716 | -0.618 | 2.000 |
| 429 | + | 24 | HG.3  | -0.022716 | -0.618 | 2.000 |
| 430 | + | 24 | HG.4  | -0.022716 | -0.618 | 2.000 |
| 431 | + | 24 | HG.5  | -0.022716 | -0.618 | 2.000 |
| 432 | + | 17 | AG.1  | -0.014547 | -0.396 | 2.000 |
| 433 | + | 11 | HU.1  | 0.000945  | 0.026  | 2.000 |
| 434 | + | 11 | HU.4  | 0.000945  | 0.026  | 2.000 |
| 435 | + | 11 | HU.2  | 0.000945  | 0.026  | 2.000 |
| 436 | + | 11 | HU.3  | 0.000945  | 0.026  | 2.000 |
| 437 | + | 11 | HU.5  | 0.000945  | 0.026  | 2.000 |
| 438 | + | 17 | T2U.1 | 0.009444  | 0.257  | 2.000 |
| 439 | + | 17 | T2U.2 | 0.009444  | 0.257  | 2.000 |
| 440 | + | 17 | T2U.3 | 0.009444  | 0.257  | 2.000 |
| 441 | + | 22 | T1U.1 | 0.029891  | 0.813  | 2.000 |
| 442 | + | 22 | T1U.3 | 0.029891  | 0.813  | 2.000 |
| 443 | + | 22 | T1U.2 | 0.029891  | 0.813  | 2.000 |
| 444 | + | 25 | HG.1  | 0.035878  | 0.976  | 2.000 |
| 445 | + | 25 | HG.2  | 0.035878  | 0.976  | 2.000 |
| 446 | + | 25 | HG.3  | 0.035878  | 0.976  | 2.000 |

|     |   |    |       |          |       |       |
|-----|---|----|-------|----------|-------|-------|
| 447 | + | 25 | HG.4  | 0.035878 | 0.976 | 2.000 |
| 448 | + | 25 | HG.5  | 0.035878 | 0.976 | 2.000 |
| 449 | + | 14 | GU.1  | 0.043412 | 1.181 | 2.000 |
| 450 | + | 14 | GU.3  | 0.043412 | 1.181 | 2.000 |
| 451 | + | 14 | GU.2  | 0.043412 | 1.181 | 2.000 |
| 452 | + | 14 | GU.4  | 0.043412 | 1.181 | 2.000 |
| 453 | + | 14 | GG.1  | 0.045727 | 1.244 | 2.000 |
| 454 | + | 14 | GG.2  | 0.045727 | 1.244 | 2.000 |
| 455 | + | 14 | GG.3  | 0.045727 | 1.244 | 2.000 |
| 456 | + | 14 | GG.4  | 0.045727 | 1.244 | 2.000 |
| 457 | + | 18 | T2U.1 | 0.049796 | 1.355 | 2.000 |
| 458 | + | 18 | T2U.2 | 0.049796 | 1.355 | 2.000 |
| 459 | + | 18 | T2U.3 | 0.049796 | 1.355 | 2.000 |
| 460 | + | 15 | GG.1  | 0.052679 | 1.433 | 2.000 |
| 461 | + | 15 | GG.2  | 0.052679 | 1.433 | 2.000 |
| 462 | + | 15 | GG.3  | 0.052679 | 1.433 | 2.000 |
| 463 | + | 15 | GG.4  | 0.052679 | 1.433 | 2.000 |
| 464 | + | 26 | HG.1  | 0.074546 | 2.028 | 2.000 |
| 465 | + | 26 | HG.2  | 0.074546 | 2.028 | 2.000 |
| 466 | + | 26 | HG.3  | 0.074546 | 2.028 | 2.000 |
| 467 | + | 26 | HG.4  | 0.074546 | 2.028 | 2.000 |
| 468 | + | 26 | HG.5  | 0.074546 | 2.028 | 2.000 |
| 469 | + | 12 | HU.1  | 0.082416 | 2.243 | 2.000 |
| 470 | + | 12 | HU.4  | 0.082416 | 2.243 | 2.000 |
| 471 | + | 12 | HU.2  | 0.082416 | 2.243 | 2.000 |
| 472 | + | 12 | HU.3  | 0.082416 | 2.243 | 2.000 |
| 473 | + | 12 | HU.5  | 0.082416 | 2.243 | 2.000 |
| 474 | + | 15 | GU.1  | 0.086333 | 2.349 | 2.000 |
| 475 | + | 15 | GU.4  | 0.086333 | 2.349 | 2.000 |
| 476 | + | 15 | GU.2  | 0.086333 | 2.349 | 2.000 |
| 477 | + | 15 | GU.3  | 0.086333 | 2.349 | 2.000 |
| 478 | + | 27 | HG.1  | 0.088900 | 2.419 | 2.000 |
| 479 | + | 27 | HG.2  | 0.088900 | 2.419 | 2.000 |
| 480 | + | 27 | HG.3  | 0.088900 | 2.419 | 2.000 |
| 481 | + | 27 | HG.4  | 0.088900 | 2.419 | 2.000 |
| 482 | + | 27 | HG.5  | 0.088900 | 2.419 | 2.000 |
| 483 | + | 7  | T1G.1 | 0.097029 | 2.640 | 2.000 |
| 484 | + | 7  | T1G.2 | 0.097029 | 2.640 | 2.000 |
| 485 | + | 7  | T1G.3 | 0.097029 | 2.640 | 2.000 |
| 486 | + | 5  | T2G.1 | 0.099113 | 2.697 | 2.000 |
| 487 | + | 5  | T2G.2 | 0.099113 | 2.697 | 2.000 |
| 488 | + | 5  | T2G.3 | 0.099113 | 2.697 | 2.000 |
| 489 | + | 23 | T1U.1 | 0.100012 | 2.721 | 2.000 |
| 490 | + | 23 | T1U.3 | 0.100012 | 2.721 | 2.000 |

|     |   |    |       |          |       |       |
|-----|---|----|-------|----------|-------|-------|
| 491 | + | 23 | T1U.2 | 0.100012 | 2.721 | 2.000 |
| 492 | + | 16 | GU.1  | 0.111758 | 3.041 | 2.000 |
| 493 | + | 16 | GU.2  | 0.111758 | 3.041 | 2.000 |
| 494 | + | 16 | GU.4  | 0.111758 | 3.041 | 2.000 |
| 495 | + | 16 | GU.3  | 0.111758 | 3.041 | 2.000 |
| 496 | + | 19 | T2U.1 | 0.116231 | 3.163 | 2.000 |
| 497 | + | 19 | T2U.2 | 0.116231 | 3.163 | 2.000 |
| 498 | + | 19 | T2U.3 | 0.116231 | 3.163 | 2.000 |
| 499 | + | 28 | HG.1  | 0.118089 | 3.213 | 2.000 |
| 500 | + | 28 | HG.2  | 0.118089 | 3.213 | 2.000 |
| 501 | + | 28 | HG.3  | 0.118089 | 3.213 | 2.000 |
| 502 | + | 28 | HG.4  | 0.118089 | 3.213 | 2.000 |
| 503 | + | 28 | HG.5  | 0.118089 | 3.213 | 2.000 |
| 504 | + | 16 | GG.1  | 0.138311 | 3.764 | 2.000 |
| 505 | + | 16 | GG.2  | 0.138311 | 3.764 | 2.000 |
| 506 | + | 16 | GG.3  | 0.138311 | 3.764 | 2.000 |
| 507 | + | 16 | GG.4  | 0.138311 | 3.764 | 2.000 |
| 508 | + | 18 | AG.1  | 0.141082 | 3.839 | 2.000 |
| 509 | + | 13 | HU.1  | 0.144218 | 3.924 | 2.000 |
| 510 | + | 13 | HU.2  | 0.144218 | 3.924 | 2.000 |
| 511 | + | 13 | HU.3  | 0.144218 | 3.924 | 2.000 |
| 512 | + | 13 | HU.4  | 0.144218 | 3.924 | 2.000 |
| 513 | + | 13 | HU.5  | 0.144218 | 3.924 | 2.000 |
| 514 | + | 24 | T1U.1 | 0.145880 | 3.970 | 2.000 |
| 515 | + | 24 | T1U.3 | 0.145880 | 3.970 | 2.000 |
| 516 | + | 24 | T1U.2 | 0.145880 | 3.970 | 2.000 |
| 517 | + | 29 | HG.1  | 0.199563 | 5.430 | 0.020 |
| 518 | + | 29 | HG.5  | 0.199563 | 5.430 | 0.020 |
| 519 | + | 29 | HG.2  | 0.199563 | 5.430 | 0.020 |
| 520 | + | 29 | HG.3  | 0.199563 | 5.430 | 0.020 |
| 521 | + | 29 | HG.4  | 0.199563 | 5.430 | 0.020 |
| 522 | + | 25 | T1U.1 | 0.211887 | 5.766 | 0.000 |
| 523 | + | 25 | T1U.3 | 0.211887 | 5.766 | 0.000 |
| 524 | + | 25 | T1U.2 | 0.211887 | 5.766 | 0.000 |
| 525 | + | 17 | GU.1  | 0.213597 | 5.812 | 0.000 |
| 526 | + | 17 | GU.2  | 0.213597 | 5.812 | 0.000 |
| 527 | + | 17 | GU.3  | 0.213597 | 5.812 | 0.000 |
| 528 | + | 17 | GU.4  | 0.213597 | 5.812 | 0.000 |
| 529 | + | 8  | T1G.1 | 0.223074 | 6.070 | 0.000 |
| 530 | + | 8  | T1G.2 | 0.223074 | 6.070 | 0.000 |
| 531 | + | 8  | T1G.3 | 0.223074 | 6.070 | 0.000 |
